# Supplementary material for: Proteomic analysis of Medulloblastoma reveals functional biology with translational potential
Source: PubMed Central journal article supplement (PMC5992829; doi:10.1186/s40478-018-0548-7), 2018-06-07
Supplement: 40478_2018_548_MOESM16_ESM.pdf [file 40478_2018_548_MOESM16_ESM.pdf]

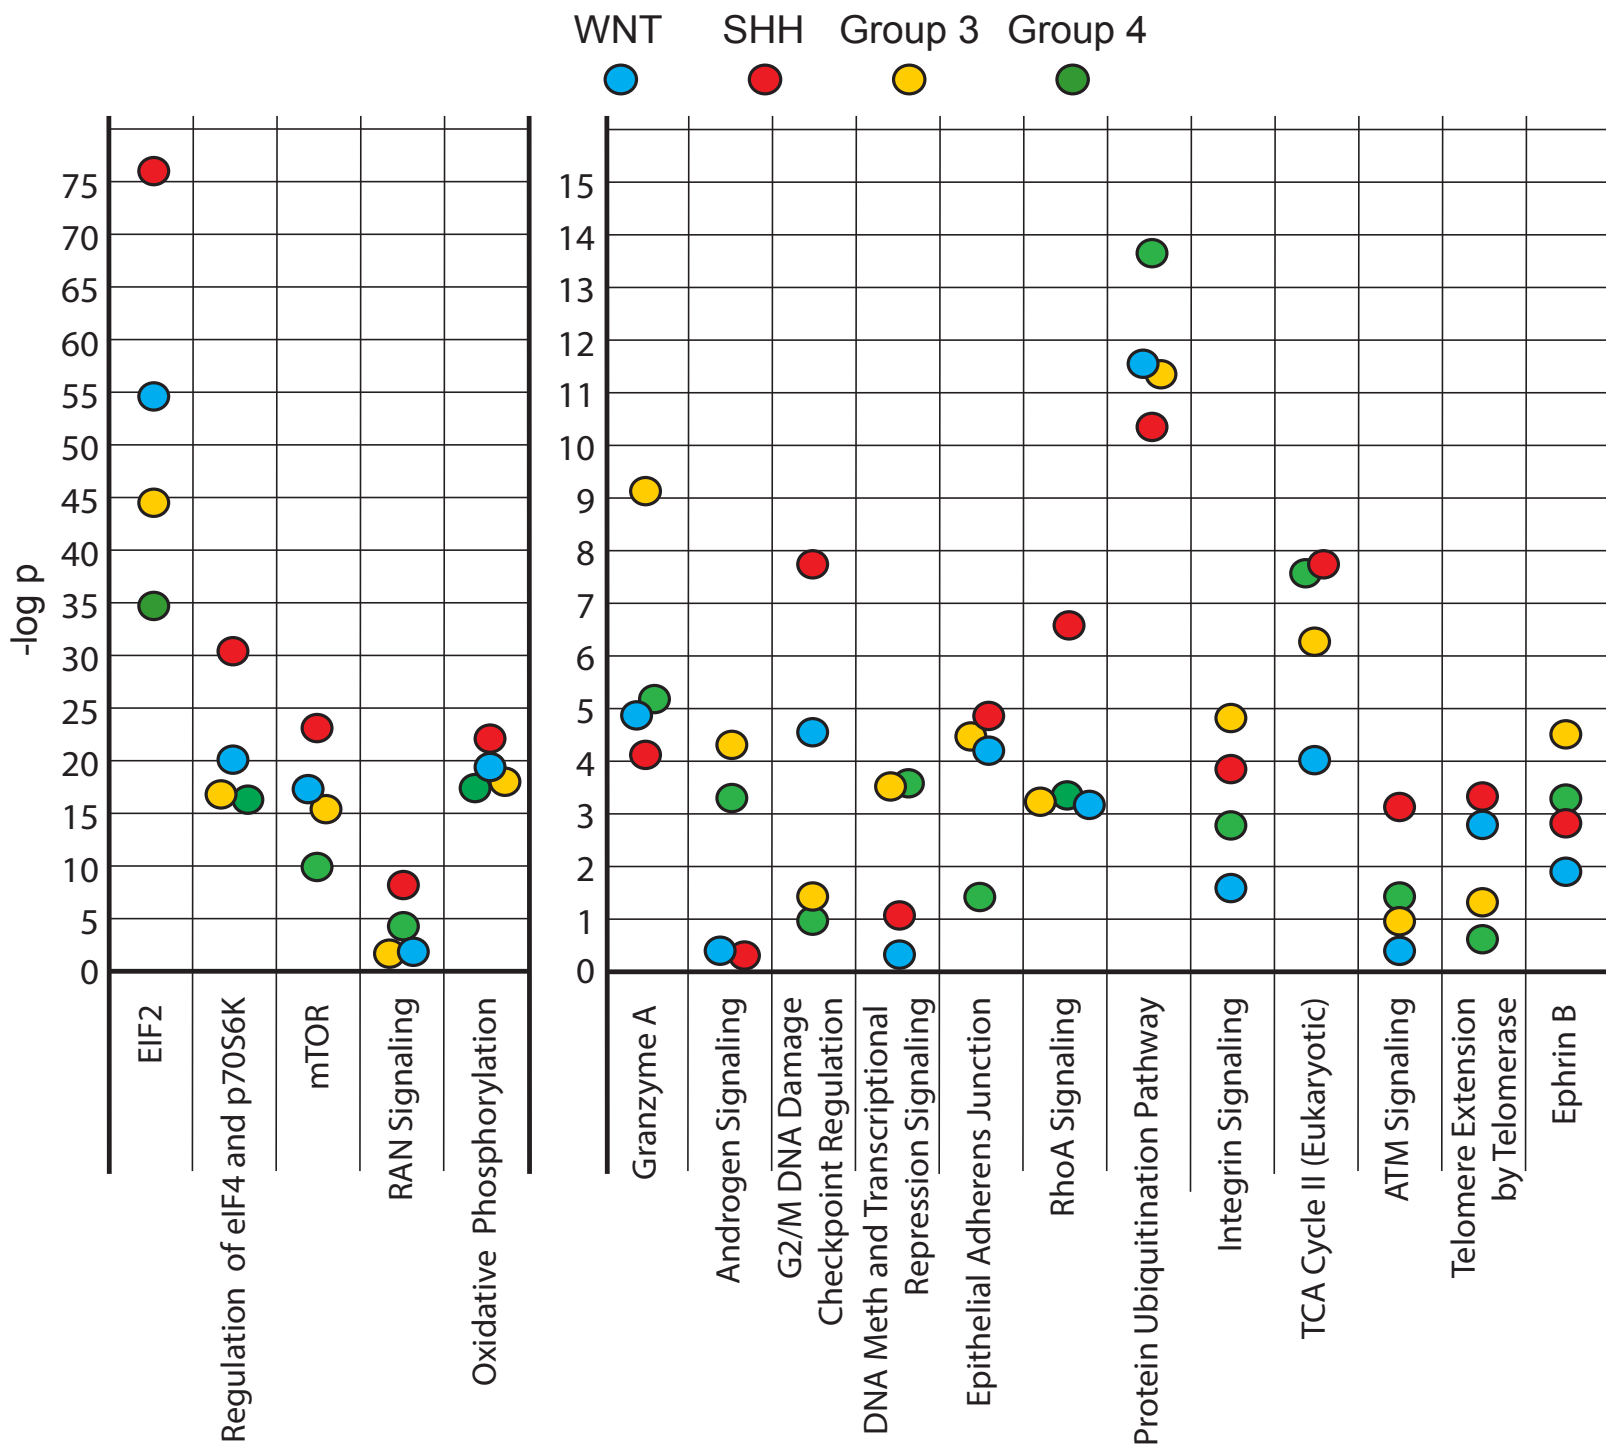

Figure S9
